# Supplementary material for: Efficacy and safety of regorafenib as beyond second-line therapy in patients with metastatic colorectal cancer: an adjusted indirect meta-analysis and systematic review
Source: PubMed Central journal article supplement — Ther Adv Med Oncol. 2020 Jul 15;12:1758835920940932. doi: 10.1177/1758835920940932 (PMC7364795; doi:10.1177/1758835920940932), 2020-07-15
Supplement: Supplemental_table_search_strategy_in_Pubmed_Regorafenib.pdf [file Supplemental_table_search_strategy_in_Pubmed_Regorafenib.pdf]

Supplemental Table 1: Search strategy in Pubmed

| No# | query                                                                                                                                                                                                                                                                                                                                                                                                                             |
|-----|-----------------------------------------------------------------------------------------------------------------------------------------------------------------------------------------------------------------------------------------------------------------------------------------------------------------------------------------------------------------------------------------------------------------------------------|
| #1  | "metastatic colorectal cancer" OR "mCRC"                                                                                                                                                                                                                                                                                                                                                                                          |
| #2  | "colorectal neoplasm" OR "colorectal cancer"<br>AND "metastatic"                                                                                                                                                                                                                                                                                                                                                                  |
| #3  | 1 OR 2                                                                                                                                                                                                                                                                                                                                                                                                                            |
| #4  | "regorafenib" OR "BAY 73-4506" OR "BAY73-4506" OR "BAY-73-4506" OR "fruquintinib" OR "TAS-102" OR "TAS102" OR "raltitrexed" OR "ZD1694" OR "cetuximab" OR "Erbix" OR "C225" OR "Apatinib" OR "YN968D1" OR "Anlotinib" OR "AL3818" OR "nivolumab" OR "ONO5438" OR "MDX1106" OR "pembrolizumab" OR "MK-3475" OR "atezolizumab" OR "RG-7446" OR "RG7446" OR "avelumab" OR "MSB0010718C" OR "durvalumab" OR "MEDI4736" OR "MEDI-4736" |
| #5  | 1 OR 2 AND 4                                                                                                                                                                                                                                                                                                                                                                                                                      |
| #6  | ((1 OR 2) AND 4) AND ("Placebo")                                                                                                                                                                                                                                                                                                                                                                                                  |
